# Supplementary material
Source: PubMed Central journal article supplement (PMC6202197)
Supplement: NIHMS974277-supplement-1.pdf [file NIHMS974277-supplement-1.pdf]

```

1 %This program will take a CBCT image set exported from the SARRP and scale
2 %it by an appropriate factor in order to allow Velocity to properly handle
3 %the data for deformable registration. This is necessary due to the
4 %difference in saturation values between the SARRP CBCT data and
5 %conventional CBCT image data based on CT number.
6
7 %Prompting user for original CBCT image folder and destination for
8 %transformed CBCT images
9 sourceFolder = uigetdir('A:\Fred Stuff\',' Please select source image folder ');
10 if ~isdir(sourceFolder)
11     errorMessage = sprintf('Error: The following folder does not exist:\n%s',↵
sourceFolder);
12     uiwait(warndlg(errorMessage));
13     return;
14 end
15
16 destinationFolder = uigetdir('A:\Fred Stuff\',' Please select tranformation folder ');
17 if ~isdir(destinationFolder)
18     errorMessage = sprintf('Error: The following folder does not exist:\n%s',↵
destinationFolder);
19     uiwait(warndlg(errorMessage));
20     return;
21 end
22
23 %Searching for dicom formatted image slices
24 filePattern = fullfile(sourceFolder, '*.dcm');
25 dcmFiles = dir(filePattern);
26
27 %Creating arrays needed for handling full CBCT image data set
28 startArray = dicomread(fullfile(sourceFolder,dcmFiles(1).name));
29 startArraySize = size(startArray);
30 imageArray = zeros(startArraySize(1), startArraySize(2));
31
32 %For loop interations dependent on number of CBCT slices. This loop will
33 %transform each image slice by a scalar and save it as a dicom in the
34 %designated destination folder
35 for k = 1:length(dcmFiles)
36     %For each iteration, the next image slice is acquired and added to the
37     %array.
38     baseFileName = dcmFiles(k).name;
39     fullFileName = fullfile(sourceFolder, baseFileName);
40     destFileName = fullfile(destinationFolder, baseFileName);
41     fprintf(1, 'Now reading %s\n', fullFileName);
42     imageArray(:, :) = dicomread(fullFileName);
43
44     %For each iteration, the header file is acquired to be copied to the new
45     %transformed image slice dicom
46     infoGrab = fullfile(sourceFolder,dcmFiles(k).name);
47     info=dicominfo(infoGrab);
48     info.SeriesNumber=2;
49
50     %Each image slice is transformed by a scalar, in this case a factor of
51     %10. This can be tailored to the specific needs of the user. In this
52     %case, the SARRP CBCT data has a maximum value of ~30000 while the max
53     %value handled by Velocity is based on CT number, which stops at 3000.
54     imageArrayTranform=imageArray/10;

```

```
55
56 %New image array must be converted to a unsigned integer 16 bit to match
57 %data formatting on the SARRP
58 imageArrayU=uint16(imageArrayTranform);
59 arraySize2=size(imageArrayU);
60
61 %Final transformed slice is written as a dicom to the designated
62 %destination folder
63 dicomwrite(reshape(imageArrayU,[arraySize2(1) arraySize2(2) 1]), destFileName,info,↵
'CreateMode', 'Copy');
64
65 %Clear memory for next iteration
66 clear infoGrab;
67 clear info;
68 clear imageArrayTransform;
69 clear imageArrayU;
70 clear arraySize2;
71 end
```
